# Supplementary material
Source: MDPI journal article supplement (https://www.mdpi.com/2673-5318/4/4/36)
Supplement: s1 [file s1]

Supplementary Figure.

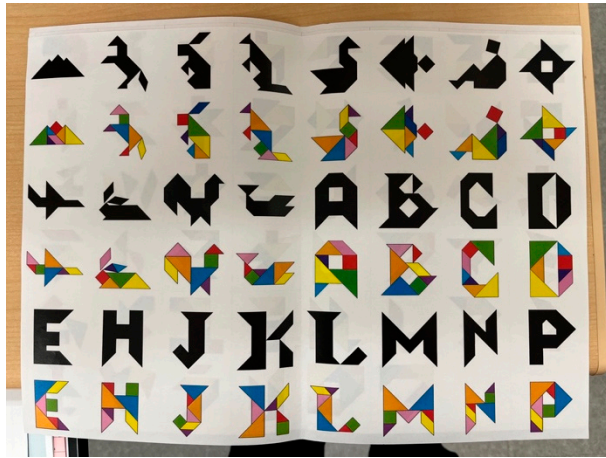

**Figure S1.** Instruction maps were printed on A3 paper.

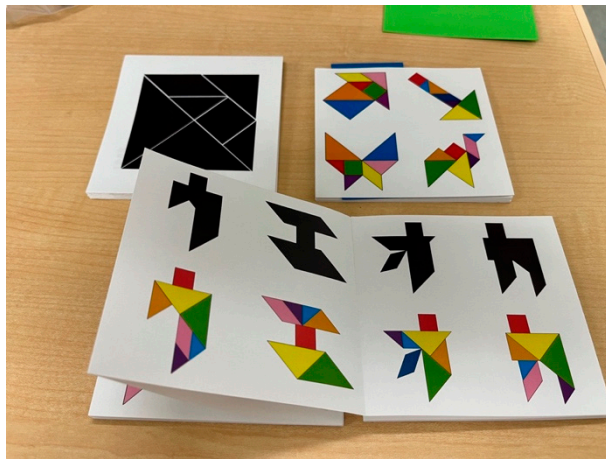

**Figure S2.** Instruction maps pamphlet.

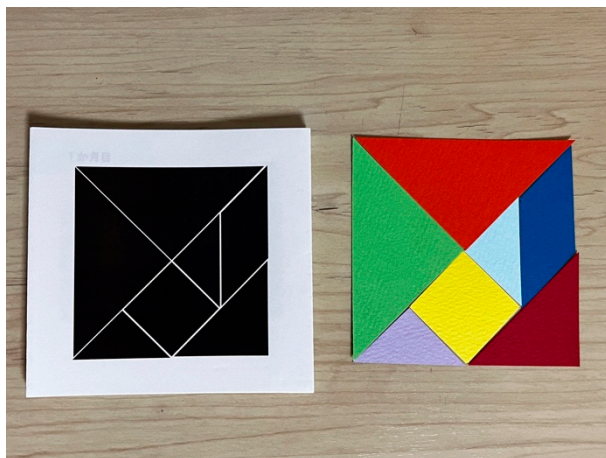

**Figure S3.** T1 target sample (Geometry image).

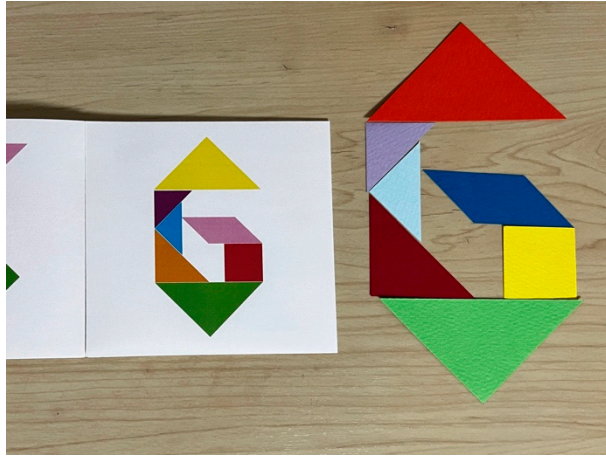

**Figure S4.** T1 target sample (Number image).

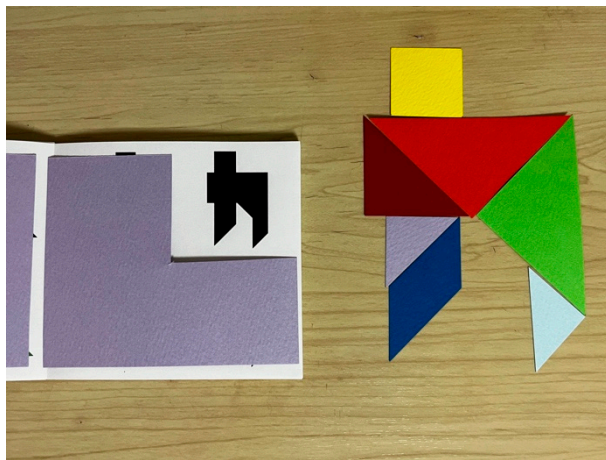

**Figure S5.** T2 target sample (Katakana image).
